# Supplementary material for: Single crystal synthesis and properties of the two-dimensional van der Waals frustrated magnets, Mn2In2Se5 and Mn2Ga2S5
Source: Royal Society of Chemistry journal article supplement (doi:10.1039/d3tc03550f), 2023-12-15
Supplement: d3tc03550f1.pdf [file d3tc03550f1.pdf]

## Supporting Information:

### Single Crystal Synthesis and Properties of the Two-Dimensional van der Waals Frustrated Magnets, $\text{Mn}_2\text{In}_2\text{Se}_5$ and $\text{Mn}_2\text{Ga}_2\text{S}_5$

Archibald J. Williams,<sup>\*a</sup> Alexander Reifsnnyder,<sup>b,c</sup> Bowen Yu,<sup>d</sup> Michael A. Susner,<sup>e</sup> Wolfgang Windl,<sup>d</sup> David W. McComb,<sup>b,c</sup> and Joshua E. Goldberger<sup>a</sup>

---

<sup>a</sup> Department of Chemistry and Biochemistry, The Ohio State University, 100 W. 18th Avenue, Columbus, Ohio 43210, United States

<sup>b</sup> Department of Materials Science and Engineering, The Ohio State University, Fontana Laboratories, 2136, 140 W 19th Ave, Columbus, OH 43210, USA

<sup>c</sup> Center for Electron Microscopy and Analysis, The Ohio State University, 1305 Kinnear Rd, Columbus, OH 43212, USA.

<sup>d</sup> Department of Materials Science and Engineering, The Ohio State University, Columbus, Ohio 43210, United States

<sup>e</sup> The Air Force Research Laboratory, Materials and Manufacturing Directorate RXEPE, Photonics Branch 2179 12th Street, Wright-Patterson AFB, OH 45433

**Table S1.** Single Crystal XRD data and structure refinement for Mn<sub>2</sub>Ga<sub>2</sub>S<sub>5</sub>

|                                   |                                                |
|-----------------------------------|------------------------------------------------|
| Report date                       | 2022-06-22                                     |
| Identification code               | Mn <sub>2</sub> Ga <sub>2</sub> S <sub>5</sub> |
| Empirical formula                 | Ga <sub>2</sub> Mn <sub>2</sub> S <sub>5</sub> |
| Molecular formula                 | Ga <sub>2</sub> Mn <sub>2</sub> S <sub>5</sub> |
| Formula weight                    | 409.62                                         |
| Temperature                       | 100.0 K                                        |
| Wavelength                        | 0.71073 Å                                      |
| Crystal system                    | Trigonal                                       |
| Space group                       | P-3m1                                          |
| Unit cell dimensions              | a = 3.7096(2) Å      a = 90°.                  |
|                                   | b = 3.7096(2) Å      b = 90°.                  |
|                                   | c = 15.1880(11) Å      g = 120°.               |
| Volume                            | 181.00(2) Å <sup>3</sup>                       |
| Z                                 | 1                                              |
| Density (calculated)              | 3.758 Mg/m <sup>3</sup>                        |
| Absorption coefficient            | 12.099 mm <sup>-1</sup>                        |
| F(000)                            | 192                                            |
| Crystal size                      | 0.056 x 0.044 x 0.038 mm <sup>3</sup>          |
| Crystal color, habit              | Orange Plate                                   |
| Theta range for data collection   | 4.025 to 30.494°.                              |
| Index ranges                      | -5<=h<=5, -5<=k<=5, -21<=l<=21                 |
| Reflections collected             | 4696                                           |
| Independent reflections           | 268 [R(int) = 0.0560, R(sigma) = 0.0194]       |
| Completeness to theta = 25.000°   | 98.8 %                                         |
| Absorption correction             | Semi-empirical from equivalents                |
| Max. and min. transmission        | 0.0511 and 0.0219                              |
| Refinement method                 | Full-matrix least-squares on F <sup>2</sup>    |
| Data / restraints / parameters    | 268 / 0 / 16                                   |
| Goodness-of-fit on F <sup>2</sup> | 1.057                                          |
| Final R indices [I>2sigma(I)]     | R1 = 0.0320, wR2 = 0.0817                      |
| R indices (all data)              | R1 = 0.0392, wR2 = 0.0866                      |
| Extinction coefficient            | n/a                                            |

|                             |                                    |
|-----------------------------|------------------------------------|
| Largest diff. peak and hole | 1.378 and -0.886 e.Å <sup>-3</sup> |
|-----------------------------|------------------------------------|

**Table S2.** Single crystal atomic coordinates ( $\times 10^4$ ) and equivalent isotropic displacement parameters ( $\text{Å}^2 \times 10^3$ ) for  $\text{Mn}_2\text{Ga}_2\text{S}_5$ .  $U(\text{eq})$  is defined as one third of the trace of the orthogonalized  $U^{\text{ij}}$  tensor.

| Atom  | x    | y     | z       | U(eq) |
|-------|------|-------|---------|-------|
| Ga(1) | 6667 | 3333  | 8355(1) | 20(1) |
| Mn(1) | 3333 | 6667  | 6019(1) | 23(1) |
| S(1)  | 6667 | 3333  | 6881(2) | 19(1) |
| S(2)  | 0    | 10000 | 5000    | 24(1) |
| S(3)  | 3333 | 6667  | 8972(1) | 21(1) |

**Table S3.** Single crystal anisotropic displacement parameters ( $\text{Å}^2 \times 10^3$ ) for  $\text{Mn}_2\text{Ga}_2\text{S}_5$ . The anisotropic displacement factor exponent takes the form:  $-2\pi^2 [h^2 a^{*2} U^{11} + \dots + 2 h k a^* b^* U^{12}]$

| Atom  | $U^{11}$ | $U^{22}$ | $U^{33}$ | $U^{23}$ | $U^{13}$ | $U^{12}$ |
|-------|----------|----------|----------|----------|----------|----------|
| Ga(1) | 18(1)    | 18(1)    | 26(1)    | 0        | 0        | 9(1)     |
| Mn(1) | 21(1)    | 21(1)    | 28(1)    | 0        | 0        | 10(1)    |
| S(1)  | 19(1)    | 19(1)    | 20(1)    | 0        | 0        | 9(1)     |
| S(2)  | 26(1)    | 26(1)    | 21(1)    | 0        | 0        | 13(1)    |
| S(3)  | 21(1)    | 21(1)    | 19(1)    | 0        | 0        | 10(1)    |

**Figure S1.** Powder XRD Rietveld refinement results for  $\text{Mn}_2\text{Ga}_2\text{S}_5$  using TOPAS 6.

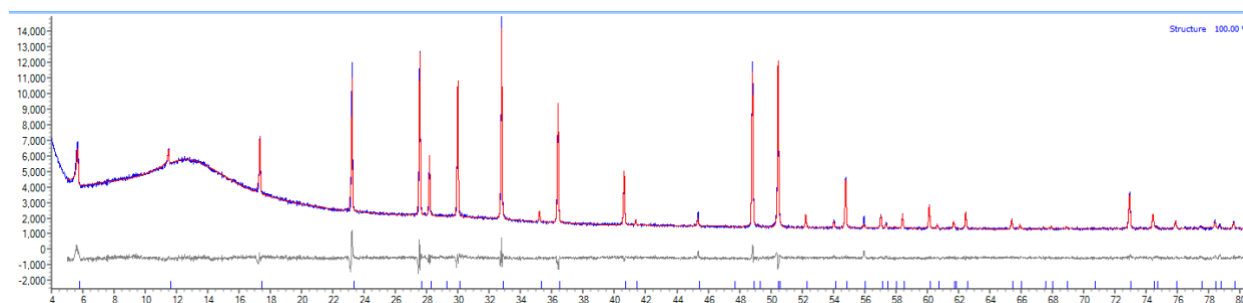

**Table S4.** Crystal data and refinement results for Mn<sub>2</sub>Ga<sub>2</sub>S<sub>5</sub>.

|                               |                                                |
|-------------------------------|------------------------------------------------|
| Empirical Formula             | Mn <sub>2</sub> Ga <sub>2</sub> S <sub>5</sub> |
| Formula weight (g/mol)        | 409.647                                        |
| Space group                   | P-3m1                                          |
| a lattice parameter (Å)       | 3.719536(18)                                   |
| c lattice parameter (Å)       | 15.23077(12)                                   |
| Cell volume (Å <sup>3</sup> ) | 182.486(2)                                     |
| Temperature (K)               | 295 K                                          |
| λ (Å)                         | 1.5406                                         |
| Pattern range (2θ)            | 5-81                                           |
| R <sub>wp</sub>               | 0.0353                                         |
| R <sub>p</sub>                | 0.0236                                         |
| R <sub>exp</sub>              | 0.0207                                         |

**Table S5.** Atomic coordinates and isotropic parameters from powder XRD Rietveld refinement results for Mn<sub>2</sub>Ga<sub>2</sub>S<sub>5</sub>.

| Element | x       | y       | z         | Occupancy | B <sub>eq</sub> |
|---------|---------|---------|-----------|-----------|-----------------|
| Mn1     | 0.33333 | 0.66667 | 0.6022(2) | 1         | 0.89(10)        |
| Ga1     | 0.33333 | 0.66667 | 0.1658(2) | 1         | 2.44(9)         |
| S1      | 0.00000 | 0.00000 | 0.50000   | 1         | 2.15(10)        |
| S2      | 0.33333 | 0.66667 | 0.3161(3) | 1         | 2.15(10)        |
| S3      | 0.33333 | 0.66667 | 0.8897(4) | 1         | 2.15(10)        |

**Figure S2.** Powder XRD Rietveld refinement results for  $\text{Mn}_2\text{In}_2\text{Se}_5$  using TOPAS 6.

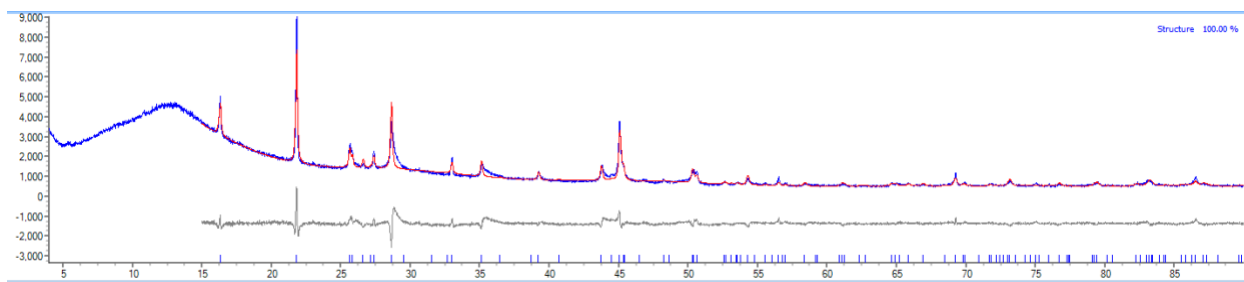

**Table S6.** Crystal data and refinement results for  $\text{Mn}_2\text{In}_2\text{Se}_5$ .

|                               |                                     |
|-------------------------------|-------------------------------------|
| Empirical Formula             | $\text{Mn}_2\text{In}_2\text{Se}_5$ |
| Formula weight (g/mol)        | 2190                                |
| Space group                   | R-3m                                |
| a lattice parameter (Å)       | 4.0189(2)                           |
| c lattice parameter (Å)       | 48.830(4)                           |
| Cell volume (Å <sup>3</sup> ) | 683.02(9)                           |
| Temperature (K)               | 295 K                               |
| $\lambda$ (Å)                 | 1.5406                              |
| Pattern range (2 $\theta$ )   | 15-90                               |
| $R_{\text{wp}}$               | 0.0798                              |
| $R_{\text{p}}$                | 0.0557                              |
| $R_{\text{exp}}$              | 0.0315                              |

**Table S7.** Atomic coordinates and isotropic parameters from powder XRD Rietveld refinement results for  $\text{Mn}_2\text{In}_2\text{Se}_5$ .

| Element | x       | y       | z           | Occupancy | $B_{\text{eq}}$ |
|---------|---------|---------|-------------|-----------|-----------------|
| Mn1     | 0.00000 | 0.00000 | 0.6998(2)   | 0.81(2)   | 1.3(5)          |
| In1     | 0.00000 | 0.00000 | 0.6998(2)   | 0.19(2)   | 1.3(5)          |
| Mn2     | 0.00000 | 0.00000 | 0.55435(15) | 0.19(2)   | 1.7(4)          |
| In2     | 0.00000 | 0.00000 | 0.55435(15) | 0.81(2)   | 1.7(4)          |
| Se1     | 0.00000 | 0.00000 | 0.13572(19) | 1         | 0.2(2)          |
| Se2     | 0.00000 | 0.00000 | 0.39225(19) | 1         | 0.2(2)          |
| Se3     | 0.00000 | 0.00000 | 0.00000     | 1         | 0.2(2)          |

**Table S8.** Reported synthesis and magnetic properties of  $M\text{Tr}_2\text{Ch}_4$  compounds. Chemical Vapor Transport (CVT), Ferromagnetic (FM), Antiferromagnetic (AFM), Neutron Powder diffraction (NPD).

| Material                   | Synthesis                  | Magnetic Ordering | Transition Temperature         | $\theta_w$ (K) | f   | Technique                  | Ref.         |
|----------------------------|----------------------------|-------------------|--------------------------------|----------------|-----|----------------------------|--------------|
| $\text{MnIn}_2\text{Se}_4$ | CVT                        | Spin glass        | 3.5 K                          | N/A            | N/A | AC $X_m$ vs. T             | <sup>1</sup> |
| $\text{MnIn}_2\text{Se}_4$ | Anneal                     | Spin glass        | 2.75 K                         | -94            | 34  | DC $X_m$ vs. T             | <sup>2</sup> |
| $\text{MnIn}_2\text{Se}_4$ | CVT                        | FM                | 7 K                            | N/A            | N/A | DC $X_m$ vs. T and M vs. H | <sup>3</sup> |
| $\text{FeIn}_2\text{Se}_4$ | CVT                        | Spin glass        | 17 K                           | -183           | 11  | DC $X_m$ vs. T             | <sup>4</sup> |
| $\text{FeIn}_2\text{Se}_4$ | Directional Solidification | Spin glass        | 18 K                           | -220           | 12  | AC $X_m$ vs. T             | <sup>5</sup> |
| $\text{FeGa}_2\text{S}_4$  | CVT                        | Spin glass to AFM | 16 K (DC)<br>5 K (NPD)         | -158.0         | 10  | DC $X_m$ vs. T and NPD     | <sup>6</sup> |
| $\text{FeGa}_2\text{S}_4$  | Powder                     | AFM to Spin glass | 33 K (Mössbauer),<br>16 K (AC) | -174           | 11  | AC $X_m$ vs. T, Mössbauer  | <sup>7</sup> |
| $\text{FeGa}_2\text{S}_4$  | CVT                        | Spin glass        | 16 K                           | -160           | 10  | DC $X_m$ vs. T             | <sup>8</sup> |
| $\text{NiGa}_2\text{S}_4$  | CVT                        | Spin glass        | 10 K                           | -80            | 8   | DC $X_m$ vs. T             | <sup>8</sup> |

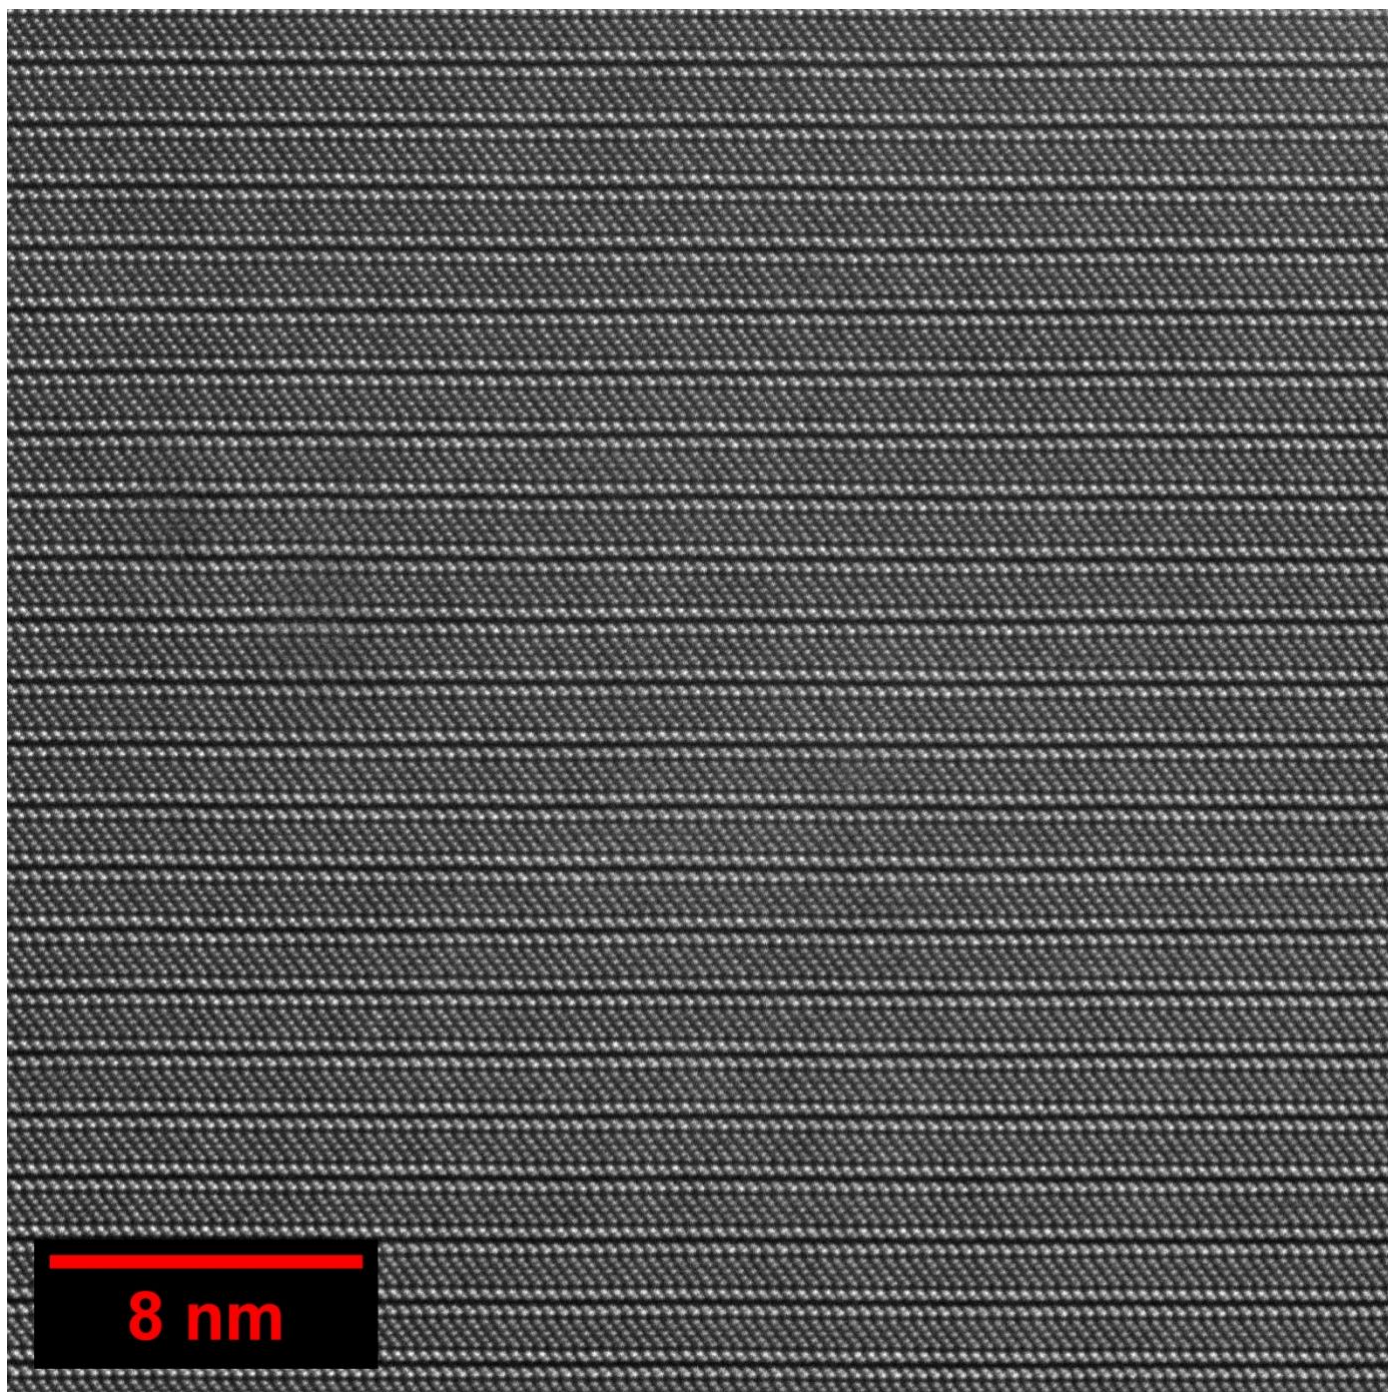

**Figure S3.** HAADF-STEM image of Mn<sub>2</sub>In<sub>2</sub>Se<sub>5</sub> viewed along the [1 0 0] direction.



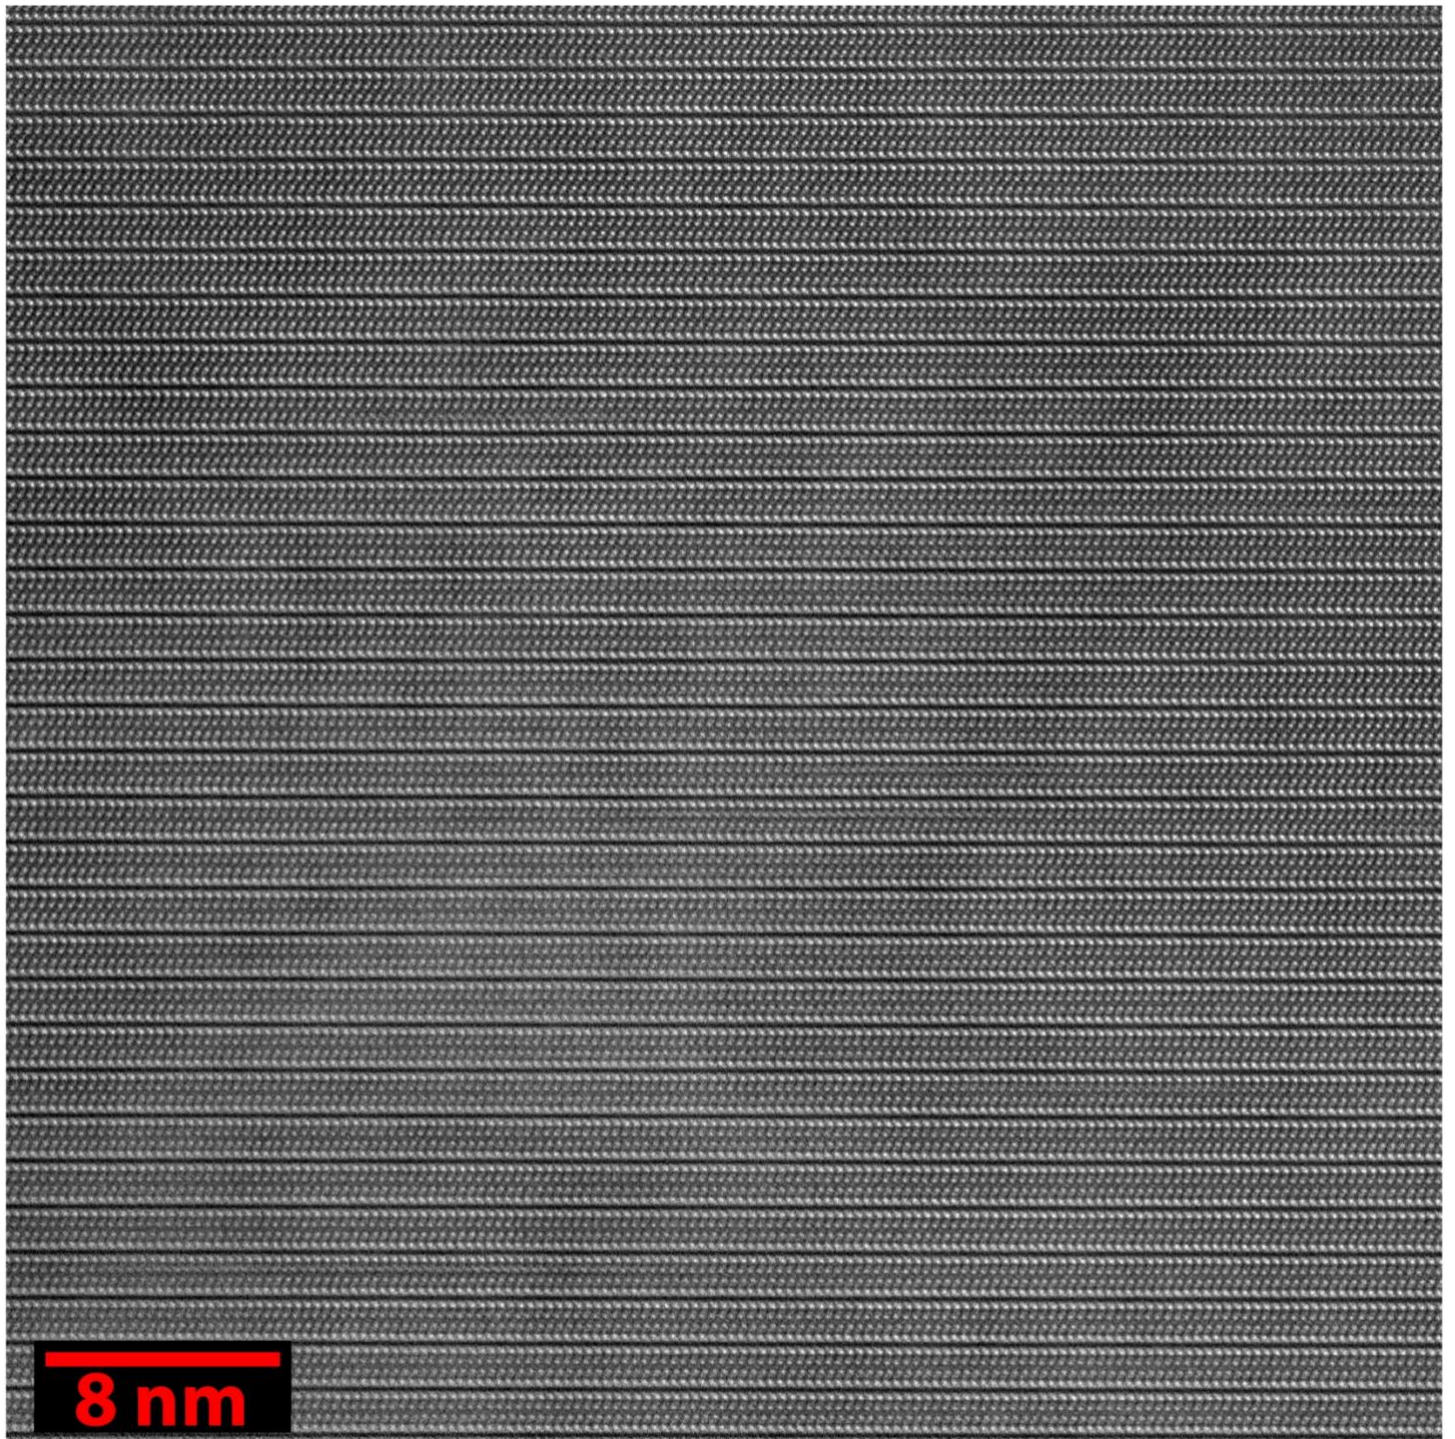

**Figure S4.** HAADF-STEM image of Mn<sub>2</sub>Ga<sub>2</sub>S<sub>5</sub> viewed along the [1 0 0] direction.



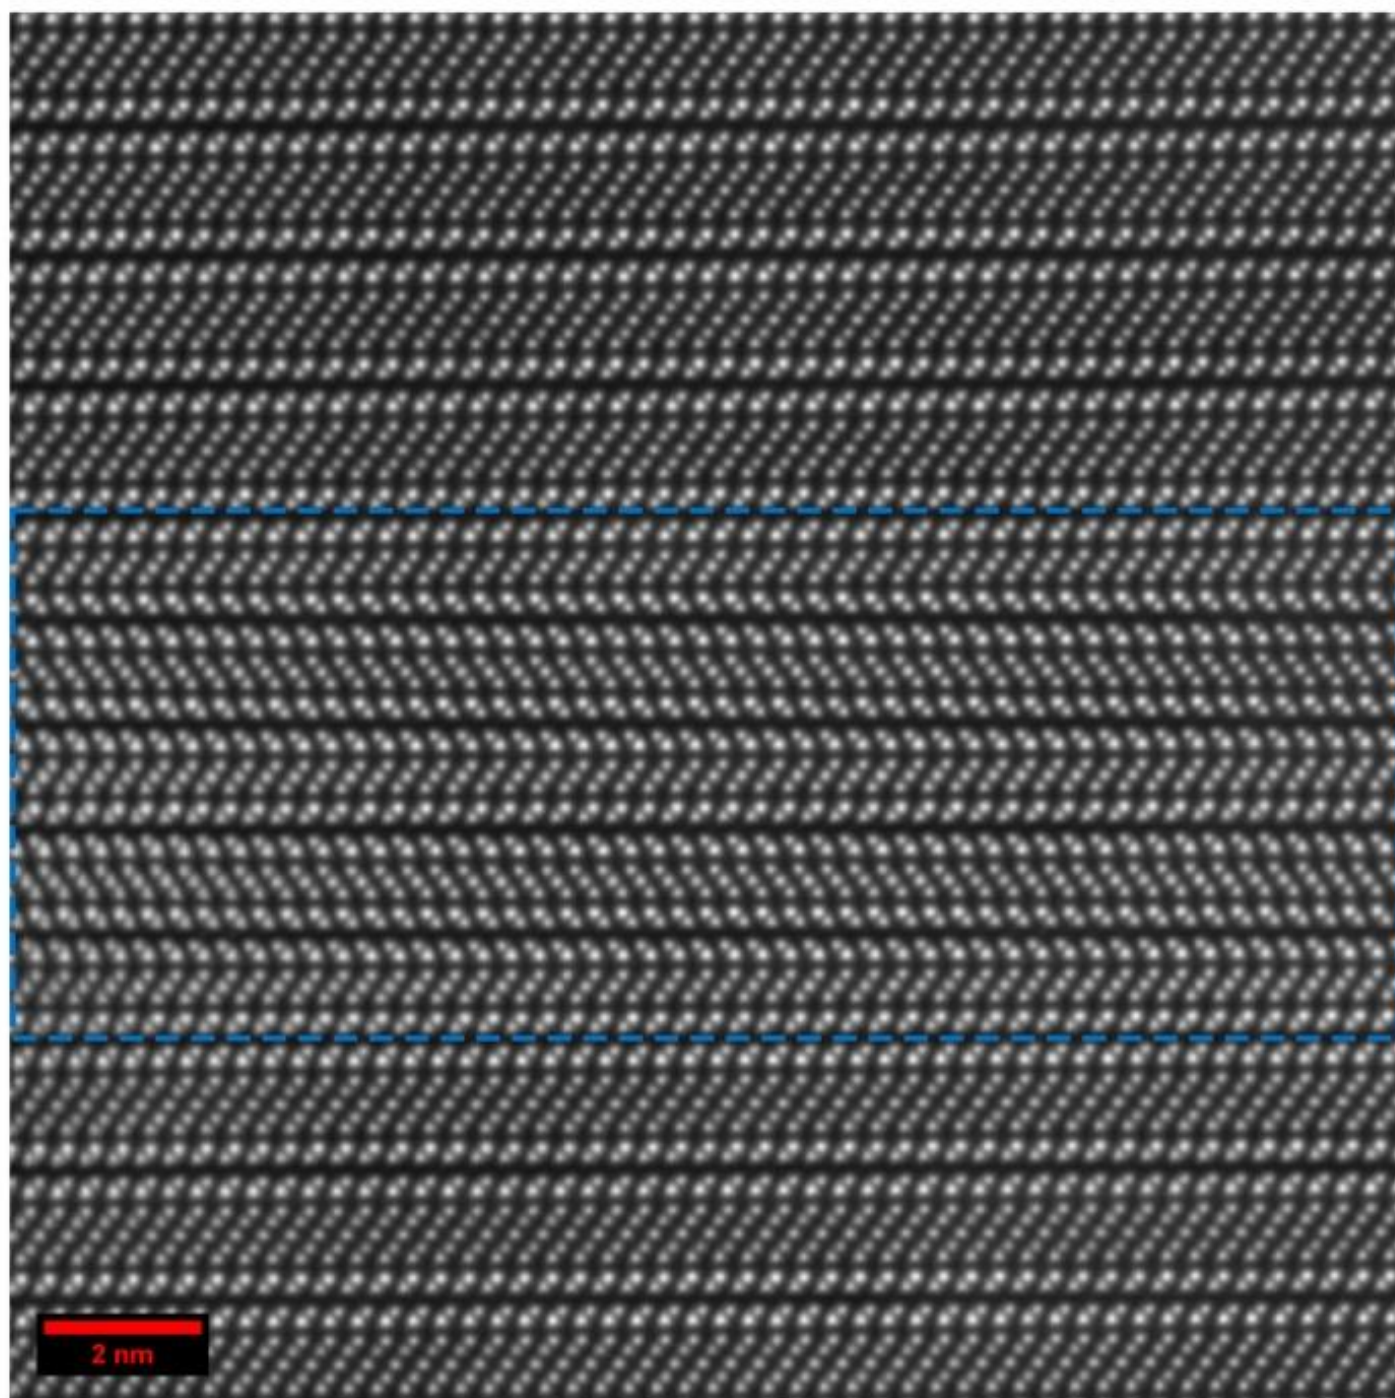

**Figure S5.** HAADF-STEM image of impure Mn<sub>2</sub>In<sub>2</sub>Se<sub>5</sub> crystals before CVT purification viewed along the [1 0 0] direction. Intergrowth layers of MnIn<sub>2</sub>Se<sub>4</sub> shown in blue box.

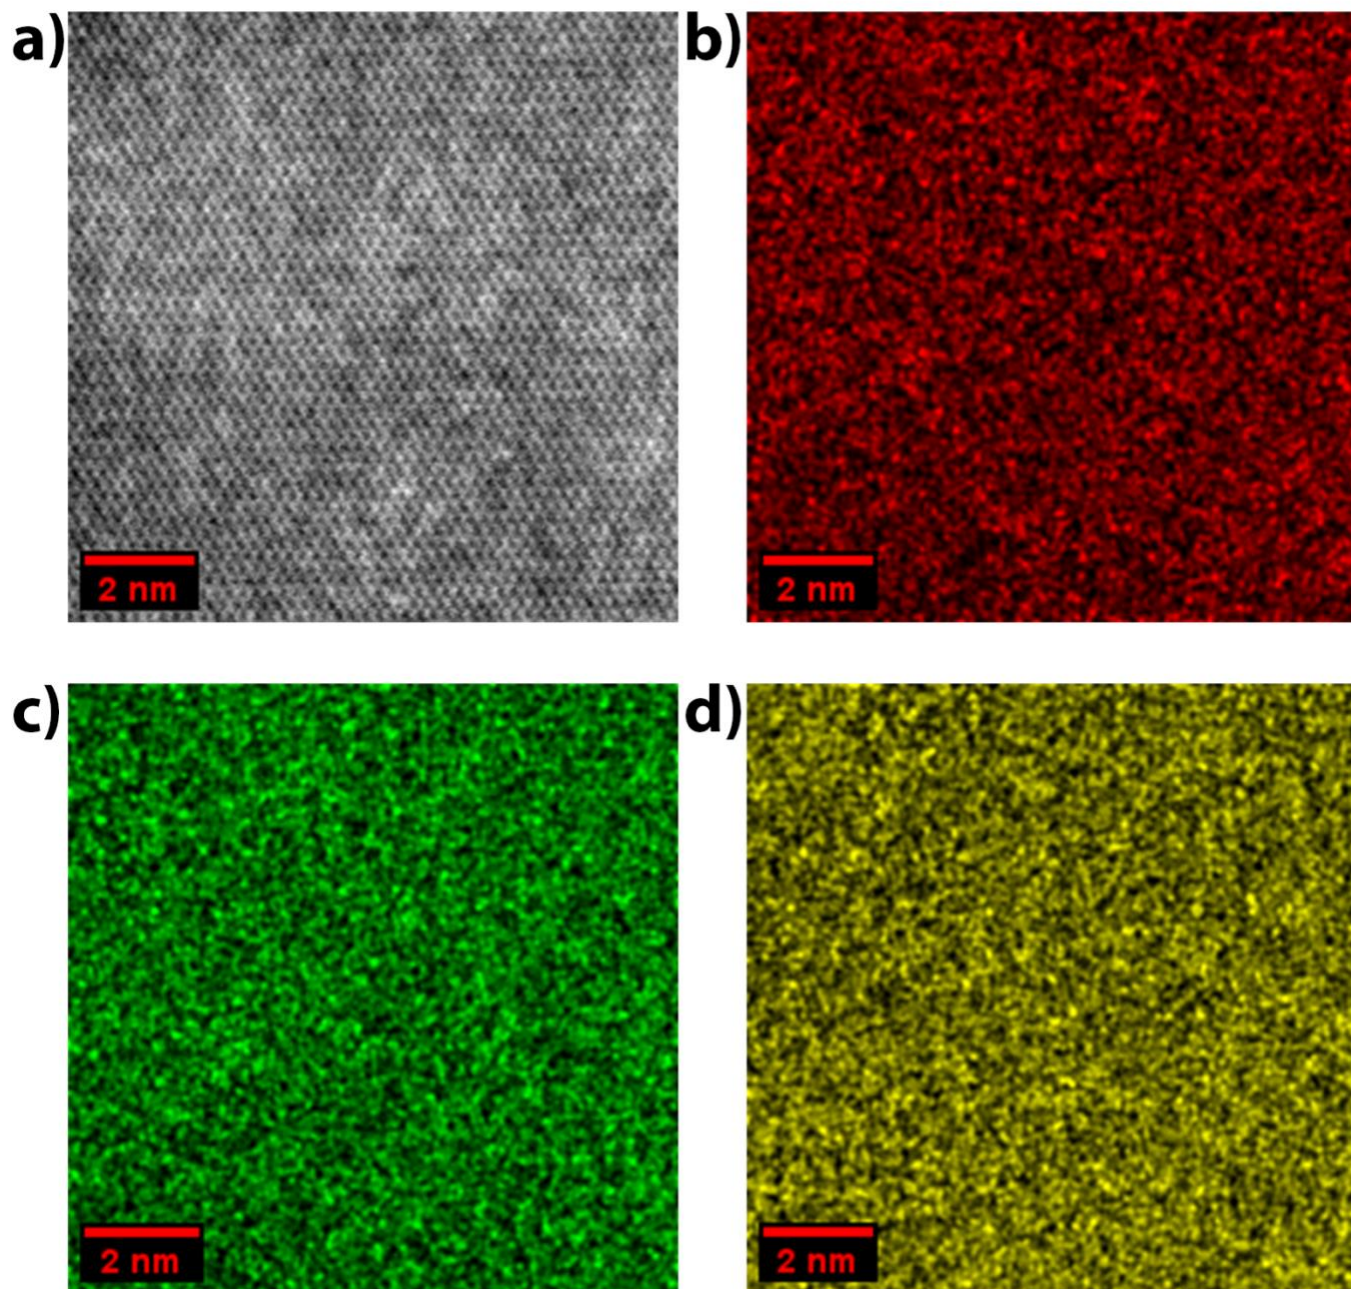

**Figure S6.** HAADF-STEM image (a) and Energy Dispersive X-ray Spectroscopy (EDX) element maps for manganese (b), indium (c), and selenium (d) of  $\text{Mn}_2\text{In}_2\text{Se}_5$  viewed along the  $[0\ 0\ 1]$  direction.

1. J. C. Mantilla Ochoa, V. Bindilatti, E. ter Haar, J. A. H. Coaquira, G. E. de Souza Brito, X. Gratens and V. Sagredo, *J. Magn. Magn. Mater.*, 2004, **272-276**, 1308-1309.
2. R. Tovar, M. Quintero, E. Quintero, P. Bocaranda, J. Ruiz, R. Cadenas, A. E. Mora, L. Höeger, J. M. Briceño, H. Rakoto, J. M. Broto and R. Barbaste, *Mater. Res. Bull.*, 2002, **37**, 1011-1022.
3. J. Yang, Z. Zhou, J. Fang, H. Wen, Z. Lou, G. Shen and Z. Wei, *Appl. Phys. Lett.*, 2019, **115**, 222101.
4. T. Torres, V. Sagredo, L. M. de Chalbaud, G. Attolini and F. Bolzoni, *Phys. B (Amsterdam, Neth.)*, 2006, **384**, 100-102.
5. I. V. Bodnar, S. A. Pauliukavets, S. V. Trukhanov and Y. A. Fedotova, *Semiconductors*, 2012, **46**, 606-610.
6. K. Guratinder, M. Schmidt, H. C. Walker, R. Bewley, M. Wörle, D. Cabra, S. A. Osorio, M. Villalba, A. K. Madsen, L. Keller, A. Wildes, P. Puphal, A. Cervellino, C. Rüegg and O. Zaharko, *Phys. Rev. B*, 2021, **104**, 064412.
7. B. R. Myoung, J. T. Lim and C. S. Kim, *J. Magn. Magn. Mater.*, 2017, **438**, 121-125.
8. S. Nakatsuji, H. Tonomura, K. Onuma, Y. Nambu, O. Sakai, Y. Maeno, R. T. Macaluso and J. Y. Chan, *Phys. Rev. Lett.*, 2007, **99**, 157203.
